# Supplementary material
Source: PubMed Central journal article supplement (PMC3449387)
Supplement: 97320630008763S1.pdf [file 97320630008763S1.pdf]

## Supplementary material:

**Table 1:** The dataset of VVSPs used in the analysis. In total 185 VVSP sequences were collected from the protein sequence databases and 11 sequences were obtained from relevant literature (indicated as 'not reported' under accession number category). The name of snake, NCBI accession number and the short reference code for each sequence is given in the table

| Viper Species                            | Accession number | Reference code | Viper Species                         | Accession number | Reference code |
|------------------------------------------|------------------|----------------|---------------------------------------|------------------|----------------|
| <i>Agkistrodon bileatus</i>              | Q9PSN3           | AB-BL          |                                       | AD147557         | EP-SP2         |
| <i>Agkistrodon contortrix contortrix</i> | P82981           | AC-CN          | <i>Gloydius blomhoffi</i>             | P81176           | GB-HY          |
|                                          | P09872           | AC-AN          |                                       | Q9PT51           | GB-BV          |
| <i>Agkistrodon piscivorus leucostoma</i> | ADP88562         | AP-PC          | <i>Gloydius blomhoffi brevicaudus</i> | AAD01624         | GBB-PA         |
|                                          | ADP88561         | AP-PA          |                                       | Q9YGY9           | GBB-H2         |
|                                          | ADW77220         | AP-TL          |                                       | P85109           | GBB-KA         |
| <i>Bitis gabonica rhinoceros</i>         | AAR24534         | BG-SP1         | <i>Gloydius halys</i>                 | Q9PTL3           | GBB-SL         |
|                                          | CBM40645         | BG-RHIN2       |                                       | Q9YGI6           | GH-P2          |
|                                          | CBM40646         | BG-RHIN3       |                                       | O93421           | GH-PS          |
|                                          | CBM40647         | BG-RHIN4       | <i>Gloydius halys</i>                 | Q802F0           | GH-PT          |
|                                          | CBM40648         | BG-RHIN5       |                                       | Q9YGY2           | GH-PL          |
| <i>Bothrops alternatus</i>               | Q61WF1           | BAI-BT         |                                       | AAC61838         | GH-SL          |
|                                          | P0CG03           | BAI-BH         |                                       | P81176           | GH-H           |
| <i>Bothrops asper</i>                    | Q072L6           | BAAs-SPL       | <i>Gloydius saxatilis</i>             | Q75ZE1           | G5a-DE         |
| <i>Bothrops atrox</i>                    | P04971           | BAI-BT         | <i>Gloydius shedaensis</i>            | Q615L0           | GSh-SH         |
|                                          | AAA48553         | BAI-BAT        |                                       | P0C5B4           | GSh-GL         |
| <i>Bothrops insularis</i>                | Q8QG86           | BI-SP          | <i>Gloydius ussuriensis</i>           | Q75ZE2           | GU-BRE         |
| <i>Bothrops jararaca</i>                 | Q5W959           | Bja-IHP2       |                                       | Q8UUJ2           | GU-TUI         |
|                                          | P81824           | Bja-PABJ       |                                       | Q91053           | GU-TC          |
|                                          | O13069           | Bja-KN         |                                       | Q8UUJ1           | GU-TUA         |
|                                          | Q9PTU8           | Bja-SPA        |                                       | O42207           | GU-CPI         |
|                                          | P81661           | Bja-BT         |                                       | Q8UVX1           | GU-TG          |
|                                          | Q5W960           | Bja-IHP1       |                                       | P86171           | GU-KR          |
|                                          | Q5W958           | Bja-IHP3       |                                       | Not reported     | GU-GS          |
| <i>Bothrops jararacussu</i>              | Q2PQJ3           | Bju-SP1        | <i>Lachesis muta muta</i>             | Q27J47           | LMM-PA         |
|                                          | Q71229           | Bju-SPH        |                                       | P33589           | LMM-GY         |
| <i>Calloselasma rhodostoma</i>           | P26324           | CR-AN          | <i>Lachesis stenophrys</i>            | Q072L7           | LS-TLE         |
|                                          | P47797           | CR-A           | <i>Macrovipera lebetina</i>           | Q9PT41           | ML-FVA         |
|                                          | CAA01526         | CR-ALP4        |                                       | Q9PT40           | ML-P2          |
|                                          | CAA01525         | CR-ALP1        |                                       | Q8JH85           | ML-AF          |
|                                          | CAA01524         | CR-ALP2        |                                       | Q8JH62           | ML-BF          |
|                                          | CAA01523         | CR-ALP3        |                                       | Not reported     | ML-P3          |
| <i>Cerastes cerastes</i>                 | Q7SYF1           | CC-CR          |                                       | Not reported     | ML-P4          |
| <i>Crotalus adamanteus</i>               | Q8UUK2           | CAAd-SP        |                                       | ADN04917         | ML-BFP         |
|                                          | Not reported     | CAAd-CR        |                                       | ADN04916         | ML-SP1         |
|                                          | AEJ32000         | CAAd-SP6       | <i>Protobothrops mucrosquamatus</i>   | ADN04918         | ML-SP3         |
|                                          | AEJ31999         | CAAd-SP5       |                                       | Q9DG84           | PM-S2          |
|                                          | AEJ31998         | CAAd-SP4       |                                       | Q91511           | PM-M5          |
|                                          | AEJ31997         | CAAd-SP3       |                                       | Q91507           | PM-M1          |
|                                          | AEJ31996         | CAAd-SP2       |                                       | Q91510           | PM-M4          |
|                                          | AEJ31995         | CAAd-SP1       |                                       | AAB01070         | PM-PT          |
| <i>Crotalus atrox</i>                    | Q8QHK2           | CAI-CT2        |                                       | Q9DG83           | PM-SK          |
|                                          | Q8QHK3           | CAI-CT1        |                                       | Q91509           | PM-M3          |
| <i>Crotalus durissus terrificus</i>      | Q58G94           | CDT-G21        | <i>Sistrurus catenatus edwardsi</i>   | Q91508           | PM-M2          |
|                                          | ABY65929         | CDT-G13        |                                       | ABG26969         | SCE-SP3        |
|                                          | ABY65930         | CDT-G14        |                                       | ABG26970         | SCE-SP4        |
|                                          | ABY65931         | CDT-G17        |                                       | ABG26974         | SCE-SP8        |
| <i>Crotalus durissus durissus</i>        | Q2QA04           | CDD-SP         |                                       | ABG26975         | SCE-SP9        |
| <i>Cryptelytrops albolabris</i>          | Not reported     | CAI-AF         |                                       | ABG26967         | SCE-SP1        |
|                                          | Not reported     | CAI-PA         |                                       | ABG26977         | SCE-SP11       |
|                                          | ABS12074         | CAI-TL1        |                                       | ABG26968         | SCE-SP2        |
|                                          | ABS12075         | CAI-TL2        |                                       | ABG26972         | SCE-SP6        |
| <i>Daboia russelli siamensis</i>         | P18965           | DR-VG          |                                       | ABG26976         | SCE-SP10       |
|                                          | P18964           | DR-VA          |                                       | ABG26973         | SCE-SP7        |
|                                          | ADP88560         | DR-SB          |                                       | ABG26971         | SCE-SP5        |
|                                          | ADP88559         | DR-SA          | <i>Protobothrops elegans</i>          | Not reported     | PE-PI          |
|                                          | ADP88558         | DR-VGP         |                                       | P84787           | PE-EL2         |
|                                          | 3SBK_A           | DR-VS          |                                       | P84788           | PE-EL1         |
| <i>Deinagkistrodon acutus</i>            | AAW56608         | DA-TL1         | <i>Trimeresurus flavoviridis</i>      | P05620           | TF-TLE         |
|                                          | AAW56633         | DA-TL2         |                                       | 1405260A         | TF-FL          |
|                                          | AAW56609         | DA-TL3         |                                       | O13057           | TF-SP2         |
|                                          | ABK91854         | DA-TL4         |                                       | O13058           | TF-SP3         |
|                                          | ABK91856         | DA-TL5         | <i>Trimeresurus gramineus</i>         | O13059           | TG-SP1         |
|                                          | ABK97625         | DA-TL6         |                                       | O13062           | TG-SP2C        |
|                                          | ABK97628         | DA-TL7         |                                       | O13063           | TG-SP3         |
|                                          | ABK91852         | DA-TL8         |                                       | O13060           | TG-SP2A        |
|                                          | AAK52506         | DA-TL10        |                                       | O13061           | TG-SP2B        |
|                                          | ABK97627         | DA-TL11        | <i>Trimeresurus jerdonii</i>          | Q9DF66           | TJ-SP3         |
|                                          | ABK91853         | DA-TL12        |                                       | Q9DF67           | TJ-SP2         |
|                                          | ABK97626         | DA-TL13        |                                       | Q9DF68           | TJ-SP1         |
|                                          | 1OP2_A           | DA-ASII        |                                       | B0ZT25           | TJ-SPH         |
|                                          | 1OP0_A           | DA-ASI         | <i>Viridovipera stejneri</i>          | Q8AY79           | VS-S2          |
|                                          | AAD19350         | DA-DF          |                                       | Q71QH7           | VS-PA          |
|                                          | Q918X0           | DA-DK          |                                       | 1BQY_A           | VS-VPA         |
|                                          | Q918W9           | DA-DX          |                                       | Q8AY82           | VS-SPH1        |
|                                          | CAC00530         | DA-AC2         |                                       | Q71QJ1           | VS-KN9         |
|                                          | CAB46431         | DA-AC          |                                       | Q71QI8           | VS-KN10        |
|                                          | Q918X2           | DA-AT          |                                       | Q71QJ3           | VS-KN1         |
|                                          | ACF17164         | DA-VY          |                                       | Q71QH5           | VS-KN8         |
|                                          | Not reported     | DA-P1          |                                       | Q71QI5           | VS-KN3         |
|                                          | Not reported     | DA-P7          |                                       | Q71QI7           | VS-KN11        |
|                                          | Not reported     | DA-P8          |                                       | Q71QI4           | VS-KN5         |
|                                          | Not reported     | DA-P9          |                                       | Q71QJ4           | VS-KNH4        |
|                                          | ABV89584         | DA-TL          |                                       | Q71QI1           | VS-KN12        |

|                                |          |                         |          |         |
|--------------------------------|----------|-------------------------|----------|---------|
| <i>Echis coloratus</i>         | ADI47576 | EC-SP1                  | Q71QH6   | VS-KN13 |
|                                | ADI47574 | EC-SP2                  | Q8AY80   | VS-S1   |
|                                | ADI47566 | EC-SP3                  | Q8AY78   | VS-SP5  |
|                                | ADI47562 | EC-SP4                  | Q8AY81   | VS-SJ   |
|                                | ADI47559 | EC-SP5                  | AAQ02901 | VS-C3   |
|                                | ADI47552 | EC-SP6                  | AAQ02898 | VS-C1   |
|                                | ADI47549 | EC-SP7                  | Q71QI3   | VS-C5   |
| <i>Echis ocellatus</i>         | ADE45141 | EO-SP                   | AAQ02909 | VS-C4   |
|                                | ADC52861 | EO-SP1                  | Q71QI2   | VS-C2   |
|                                | ADE45139 | EO-SP2                  | Q71QI0   | VS-KNH7 |
|                                | ADE45140 | EO-SP3                  | Q71QJ0   | VS-KN2  |
|                                | CAQ72889 | EO-SP4                  | Q71QJ2   | VS-KN6  |
|                                | ADI47555 | EO-SP5                  | Q71QH9   | VS-KN14 |
|                                | ADI47558 | EP-SP1                  | CBW30778 | VN-NI   |
| <i>Echis pyramidum leakeyi</i> |          | <i>Vipera nikolskii</i> |          |         |

**Table 2:** VVSPs with substitutions for cysteine residues involved in the formation of disulphide linkages. The VVSPs and their substituted residue (blue) in the appropriate positions are shown in table. The positions of two corresponding cysteine residues which form disulphide linkage are placed next to each other to indicate the missing disulphide linkage due to substitution. VVSPs normally contain 6 disulphide linkages; C22-C157, C42-C58, C91-C245e, C136-C201, C168-C182 and C191-C220. X indicates the substituted residue and - indicates a deletion.

| Name of VVSP | 22 | 157 | 42 | 58 | 91 | 245e | 136 | 201 | 168 | 182 | 191 | 220 |
|--------------|----|-----|----|----|----|------|-----|-----|-----|-----|-----|-----|
| BAI-BH       | C  | C   | C  | C  | X  | C    | C   | C   | C   | C   | C   | C   |
| CAd-SP5      | C  | C   | C  | C  | C  | X    | C   | C   | C   | C   | C   | C   |
| CC-CR        | C  | C   | X  | C  | C  | C    | C   | C   | C   | C   | C   | C   |
| DA-DK        | C  | C   | C  | C  | C  | C    | C   | X   | C   | C   | C   | C   |
| DA-TL4       | C  | C   | C  | X  | C  | C    | C   | C   | C   | C   | C   | C   |
| DA-TL7       | C  | C   | C  | C  | C  | C    | C   | X   | C   | C   | C   | C   |
| EO-SP2       | C  | C   | C  | C  | C  | X    | C   | C   | C   | C   | C   | C   |
| EO-SP5       | C  | C   | C  | C  | C  | -    | C   | C   | C   | C   | C   | C   |
| EO-SP6       | C  | C   | C  | C  | C  | X    | C   | C   | C   | C   | C   | C   |
| GBB-SL       | C  | C   | C  | C  | X  | C    | C   | C   | C   | C   | C   | C   |
| VS-KN5       | C  | C   | X  | C  | C  | C    | C   | C   | C   | C   | C   | C   |
| VS-KN6       | C  | C   | X  | C  | C  | C    | C   | C   | C   | C   | C   | C   |
| VS-KN14      | C  | C   | X  | C  | C  | C    | C   | C   | C   | C   | C   | C   |

**Table 3:** VVSPs with substituted catalytic triad residues. VVSPs with various substitutions (blue) for their catalytic triad residues are shown in table. Normally VVSPs contain H57, D102 and S195 in their catalytic triad.

| Name of VVSP | 57 | 102 | 195 | Name of VVSP | 57 | 102 | 195 |
|--------------|----|-----|-----|--------------|----|-----|-----|
| BGSP1        | R  | D   | N   | ML-P2        | R  | D   | N   |
| BG-RHIN2     | R  | D   | N   | ML-P3        | H  | D   | N   |
| BG-RHIN3     | R  | D   | N   | ML-P4        | R  | D   | S   |
| BAI-BH       | N  | T   | S   | TF-SP2       | R  | D   | S   |
| Bas-SPL      | N  | D   | S   | TG-SP2A      | R  | D   | S   |
| Bja-HP3      | Q  | D   | S   | TJ-SP1       | R  | D   | P   |
| Bju-SPH      | N  | D   | S   | TJ-SPH       | R  | D   | S   |
| CAd-SP6      | H  | D   | A   | VS-SPH1      | R  | D   | S   |
| EC-SP4       | R  | D   | T   | VS-KNH4      | R  | D   | S   |
| EC-SP5       | R  | D   | T   | VS-KNH7      | R  | D   | S   |
| EO-SP        | R  | D   | T   |              |    |     |     |

**Table 4:** VVSPs with substituted primary specificity pocket residues. VVSPs with various substitutions (blue) for their specificity pocket residues are shown in table. Normally VVSPs contain D189, G216 and G/A226 in their specificity pocket.

| Name of VVSP | 189 | 216 | 226 | Name of VVSP | 189 | 216 | 226 |
|--------------|-----|-----|-----|--------------|-----|-----|-----|
| AP-PA        | D   | R   | G   | DA-TL12      | G   | G   | G   |
| BG-SP1       | D   | E   | A   | DR-SA        | G   | G   | S   |
| BG-RHIN2     | D   | E   | A   | DR-SB        | G   | G   | V   |
| BG-RHIN3     | D   | E   | A   | EC-SP6       | G   | G   | G   |
| BG-RHIN4     | G   | A   | G   | EC-SP7       | G   | V   | G   |
| BG-RHIN5     | G   | A   | G   | EP-SP1       | G   | G   | V   |
| Bja-HP3      | D   | R   | G   | EP-SP2       | G   | G   | V   |
| CAd-SP3      | G   | G   | G   | EO-SP1       | G   | V   | G   |
| CR-ALP2      | S   | G   | A   | EO-SP2       | G   | S   | G   |
| CDD-SP       | G   | G   | E   | ML-AF        | G   | G   | G   |
| DA-AC        | G   | G   | G   | ML-BF        | G   | G   | V   |
| DA-AC2       | G   | G   | G   | SCE-SP9      | S   | G   | S   |
| DA-TL5       | G   | G   | G   | SCE-SP5      | S   | G   | G   |
| DA-TL6       | G   | G   | G   | TF-SP3       | G   | G   | G   |
| DA-TL7       | G   | G   | G   | TG-SP3       | D   | G   | N   |
| DA-TL8       | G   | G   | G   | VS-C2        | G   | T   | A   |
| DA-TL10      | G   | G   | G   | VS-KN8       | D   | G   | V   |
| DA-TL11      | G   | G   | G   |              |     |     |     |
